# Supplementary material for: Evaluation of Implementing a Home-Based Fall Prevention Program among Community-Dwelling Older Adults
Source: MDPI journal article supplement (doi:10.3390/ijerph16061079), 2019-03-26
Supplement: s1 [file s1]

## Supplementary Materials

**Table S1.** Baseline characteristics of older adults that applied for the study, but that did not participate.

|                                 | <b>Total<br/>(n = 212)</b> | <b>No Informed<br/>Consent<br/>(n = 180)</b> | <b>Dropped Out<br/>before Start<br/>(n = 32)</b> |
|---------------------------------|----------------------------|----------------------------------------------|--------------------------------------------------|
|                                 | <i>n (%)</i>               | <i>n (%)</i>                                 | <i>n (%)</i>                                     |
| Female                          | 136 (65) <sup>a</sup>      | 116 (65) <sup>e</sup>                        | 20 (65) <sup>g</sup>                             |
| Age-mean ± SD                   | 82.3 ± 8.5 <sup>b</sup>    | 82.2 ± 8.6 <sup>f</sup>                      | 82.7 ± 7.6 <sup>g</sup>                          |
| Living alone                    | 144 (69) <sup>c</sup>      | 123 (69) <sup>e</sup>                        | 21 (66)                                          |
| Elevated fall risk <sup>1</sup> | 26 (81)                    | n.a. <sup>*</sup>                            | 26 (81)                                          |

SD: Standard deviation; <sup>1</sup> The fall risk test (part of a fall analysis assessment) determined that an elevated fall risk was present when a participant had a fall in the past twelve months, or the participant had mobility problems and a fear of falling [1,2]; <sup>a</sup>: n = 209; <sup>b</sup>: n = 195; <sup>c</sup>: n=210; <sup>d</sup>: n = 32; <sup>e</sup>: n = 178; <sup>f</sup>: n =164; <sup>g</sup>: n = 31.

## References

1. Veiligheid, N.L. Valanalyse Inventarisatie Valrisico 65+ Door de Eerstelijnszorg [Fall Analysis Assessment Fall Risk 65+ by Primary Care]. 2018. Available from: <https://www.veiligheid.nl/valpreventie/interventies/screening/valanalyse> (accessed on 15 December 2018). (In Dutch)
2. Richtlijnen Database. *Preventie van valincidenten bij ouderen [Falls Prevention among Older Adults]*; 2017. (In Dutch)
